# Supplementary material for: Convergent olfactory circuits for courtship in Drosophila revealed by ds-Tango
Source: PubMed Central journal article supplement — bioRxiv. 2024 Oct 23:2024.10.23.619891. Preprint. [Version 1] doi: 10.1101/2024.10.23.619891 (PMC11527207; doi:10.1101/2024.10.23.619891), 2024-10-23
Supplement: media-1.pdf [file media-1.pdf]

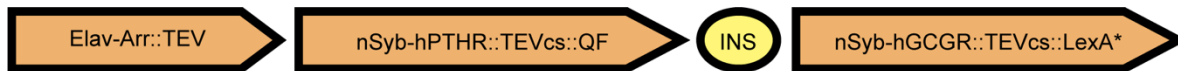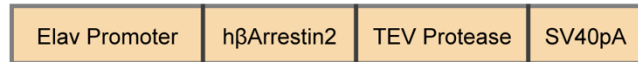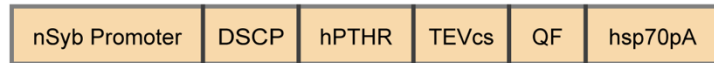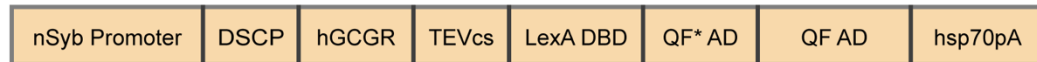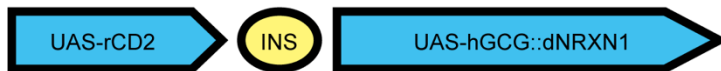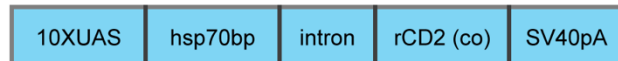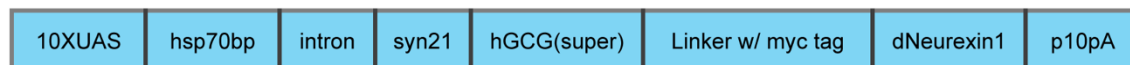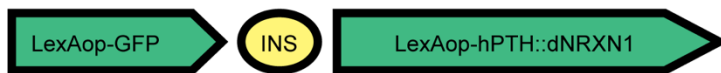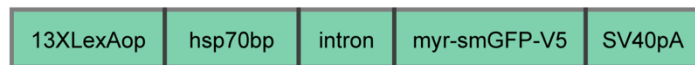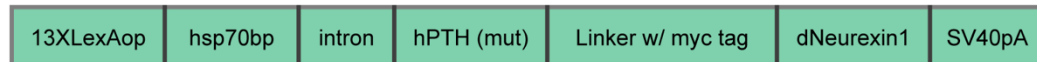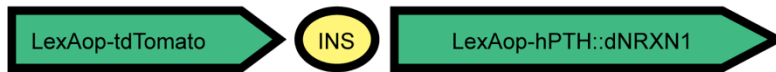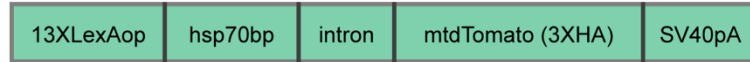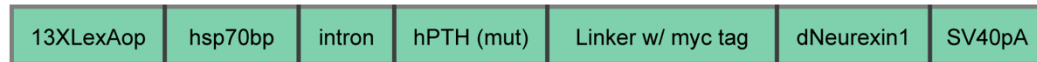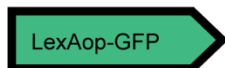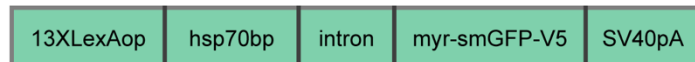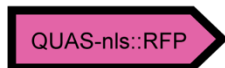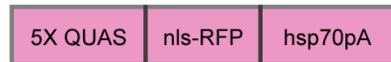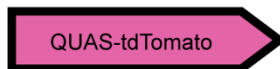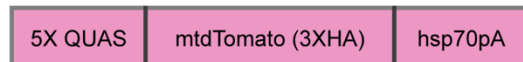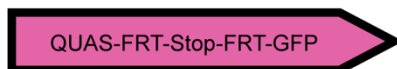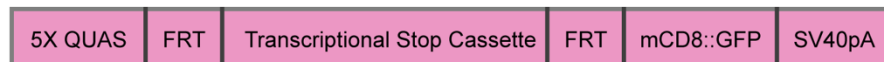

## Figure S1. Detailed genetic components of *ds*-Tango flies

Detailed descriptions of the genetic components of *ds*-Tango flies used in this study. The presence of a gypsy insulator (INS) in an allele is indicated with a circle (yellow). One allele of panneuronally expressed *ds*-Tango components (brown). One allele of Gal4-dependent *ds*-Tango components (blue). Three separate alleles of LexA\*-dependent *ds*-Tango components (green). Three separate alleles of QF-dependent *ds*-Tango components (magenta). Bolded components that are horizontal to one another indicate they were inserted as a single allele. Below every individual allele, further detail on each of the genetic components (light colored rectangles) making up the allele is shown. See methods and supplemental text for further description of genetic components, including insertion sites. Elav: *Drosophila melanogaster* panneuronal promoter; pA: polyadenylation signal; nSyb: *Drosophila melanogaster* panneuronal promoter; DSCP: *Drosophila* Synthetic Core Promoter; hGCGR: human Glucagon Receptor; TEVcs: cleavage site for N1a protease from the Tobacco Etch Virus; UAS: Upstream Activating Sequence for Gal4; hGCG: human Glucagon analogue with enhanced receptor binding; GFP: Green Fluorescent Protein; QUAS: Upstream Activating Sequence for QF; INS: gypsy insulator; hPTH: human Parathyroid Hormone; hPTHR: human Parathyroid Hormone Receptor

A

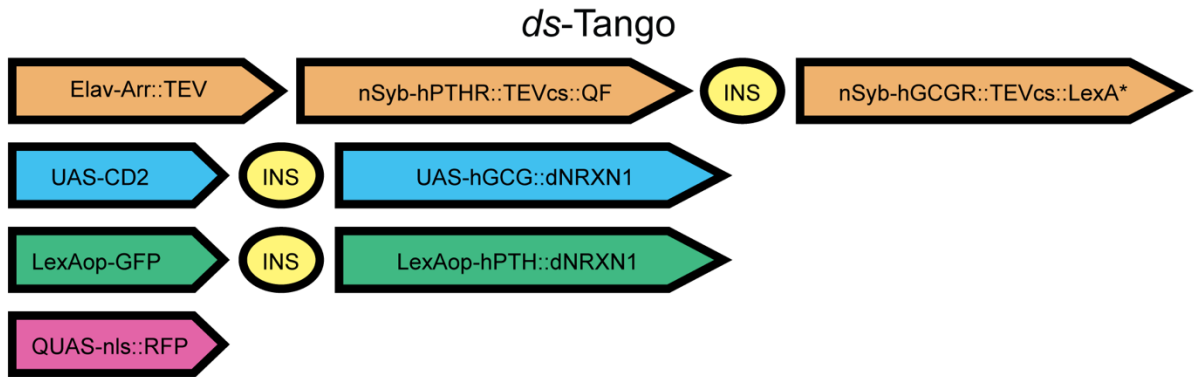

B

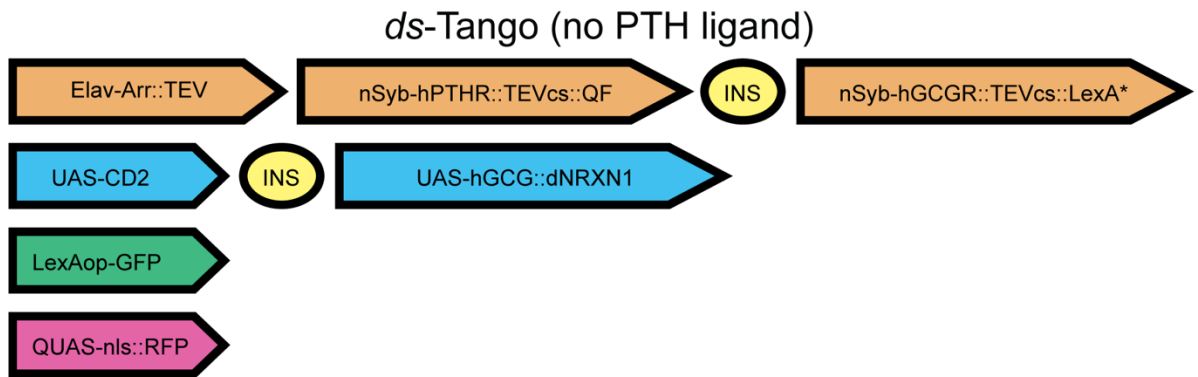

C

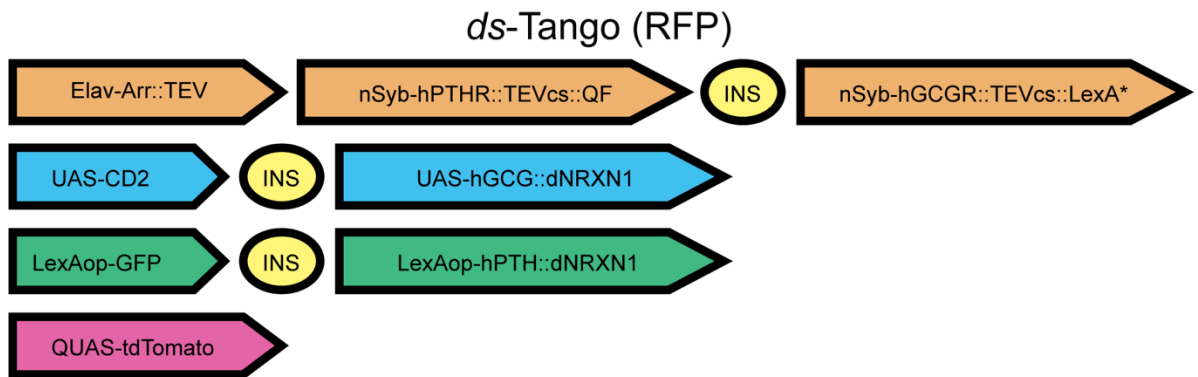

D

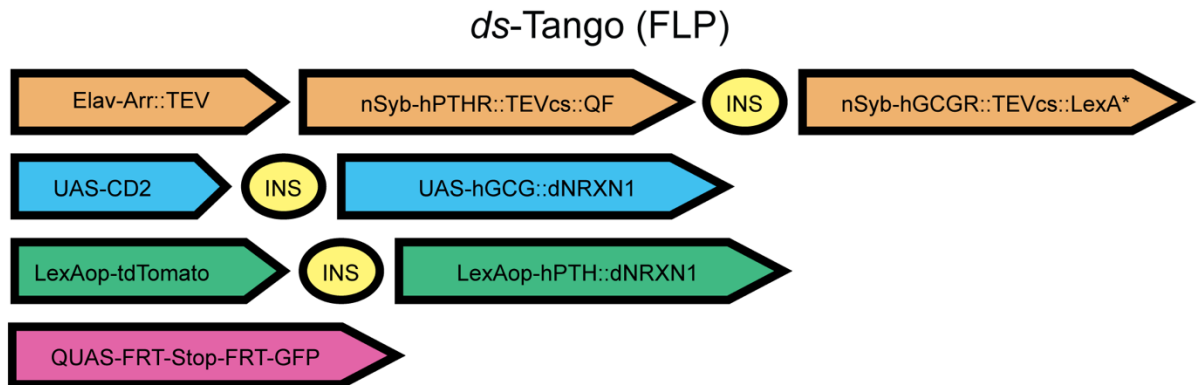

Figure S2. Broad genetic components in different configurations of *ds*-Tango

(A) The genetic components in “*ds*-Tango” flies.

(B) The genetic components in “*ds*-Tango (no PTH ligand)” flies. When compared to (A), note the lack of both a gypsy insulator (INS) (yellow) and the LexAop-hPTH::dNRXN1 sequence (green).

(C) The genetic components in “*ds*-Tango (RFP)” flies. Note these flies have a different, non-nuclear localized, disynaptic reporter (magenta) compared to the flies in (A).

(D) The genetic components in “*ds*-Tango (FLP)” flies. When compared to (A), note the different LexAop reporter, LexAop-tdTomato (green), and the different FLP-dependent third-order reporter (magenta).

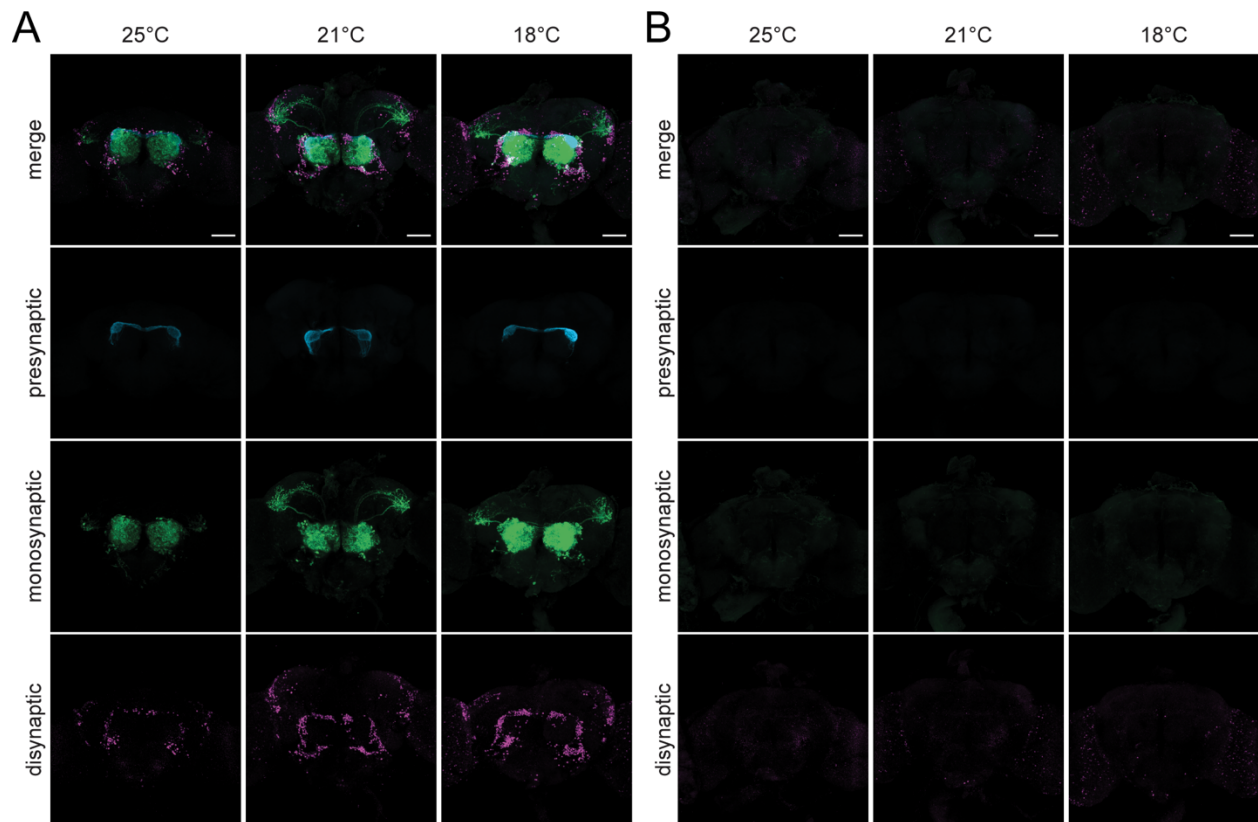

Figure S3. The effect of temperature on *ds-Tango*

(A) *ds-Tango* signal when initiated from Or67d-OSNs in flies with identical experimental parameters and image settings but crossed and raised at different temperatures (labeled at top of figure). Or67d-OSNs (cyan), their monosynaptic partners LNs and OPNs (green), and the nuclei of their disynaptic connections (magenta) are shown.

(B) No Gal4 control *ds-Tango* signal from flies with identical experimental parameters and image settings but crossed and raised at different temperatures. Presynaptic background signal (cyan), monosynaptic background signal (green), and the nuclei of the neurons where disynaptic background signal is present (magenta) are shown. Individual channels

are shown below each merged channel image. Each image is a maximum intensity Z-stack projection of a whole-mount brain. Scale bars, 50 $\mu$ m.

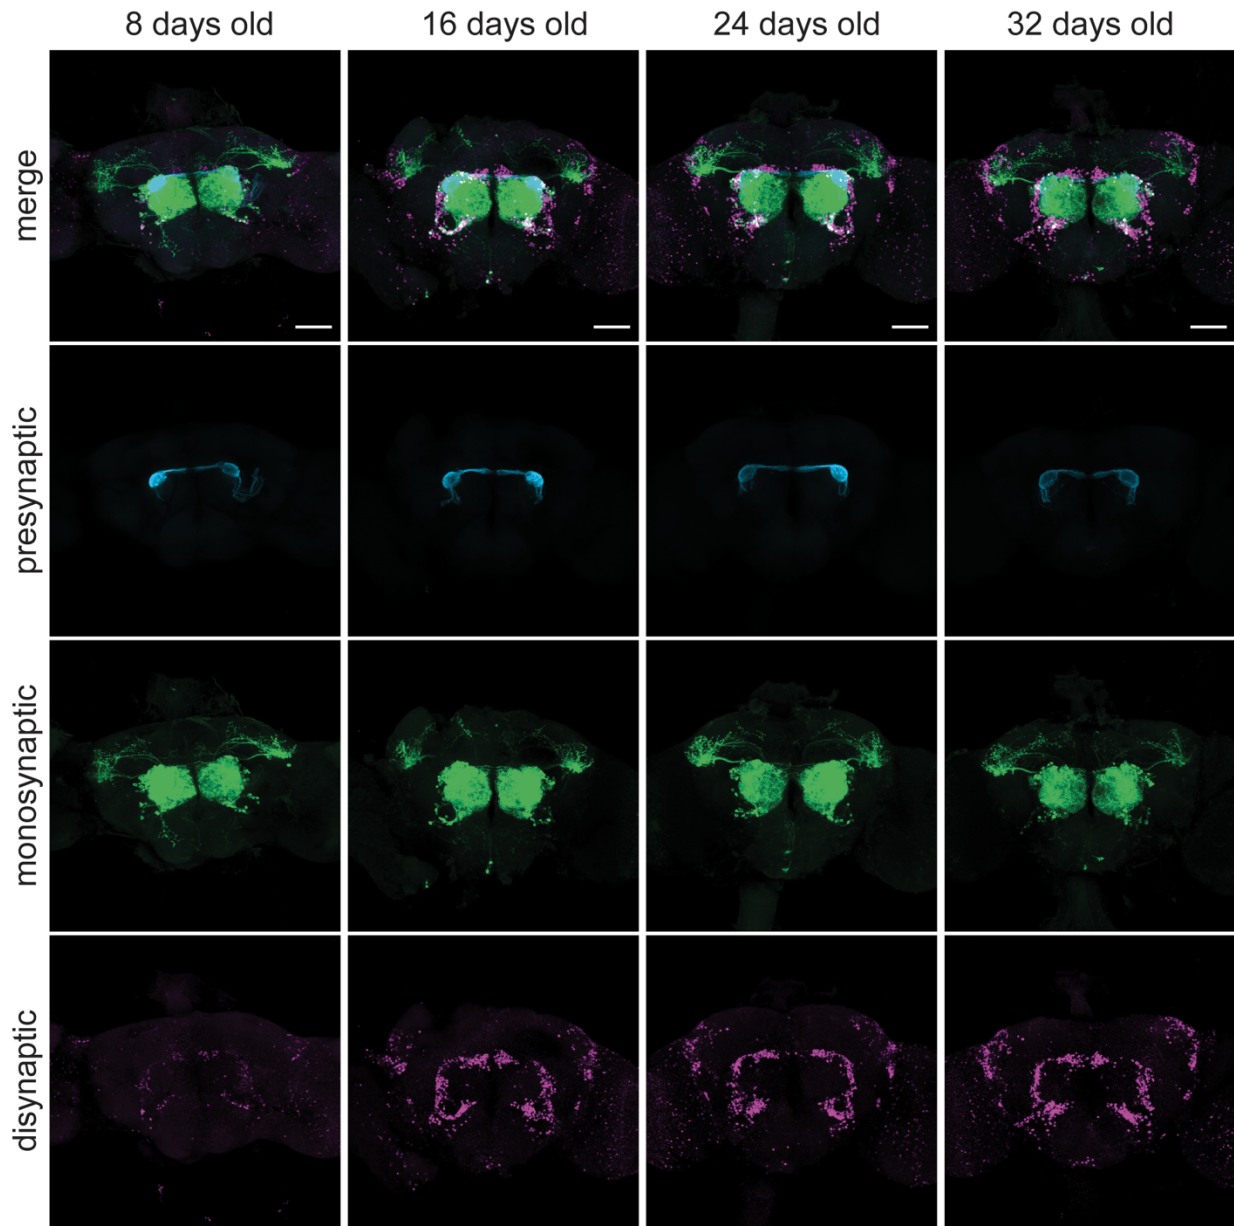

Figure S4. Age Dependence of the *ds*-Tango Signal

*ds*-Tango signal when initiated from Or67d-OSNs in flies with identical experimental parameters and image settings but dissected at different ages (labeled at top of figure). Or67d-OSNs (cyan), their monosynaptic partners LNs and OPNs (green), and the nuclei of their disynaptic connections (magenta) are shown. Individual channels are shown

below each merged channel image. Each image is a maximum intensity Z-stack projection of a whole-mount brain. Scale bars, 50 $\mu$ m.



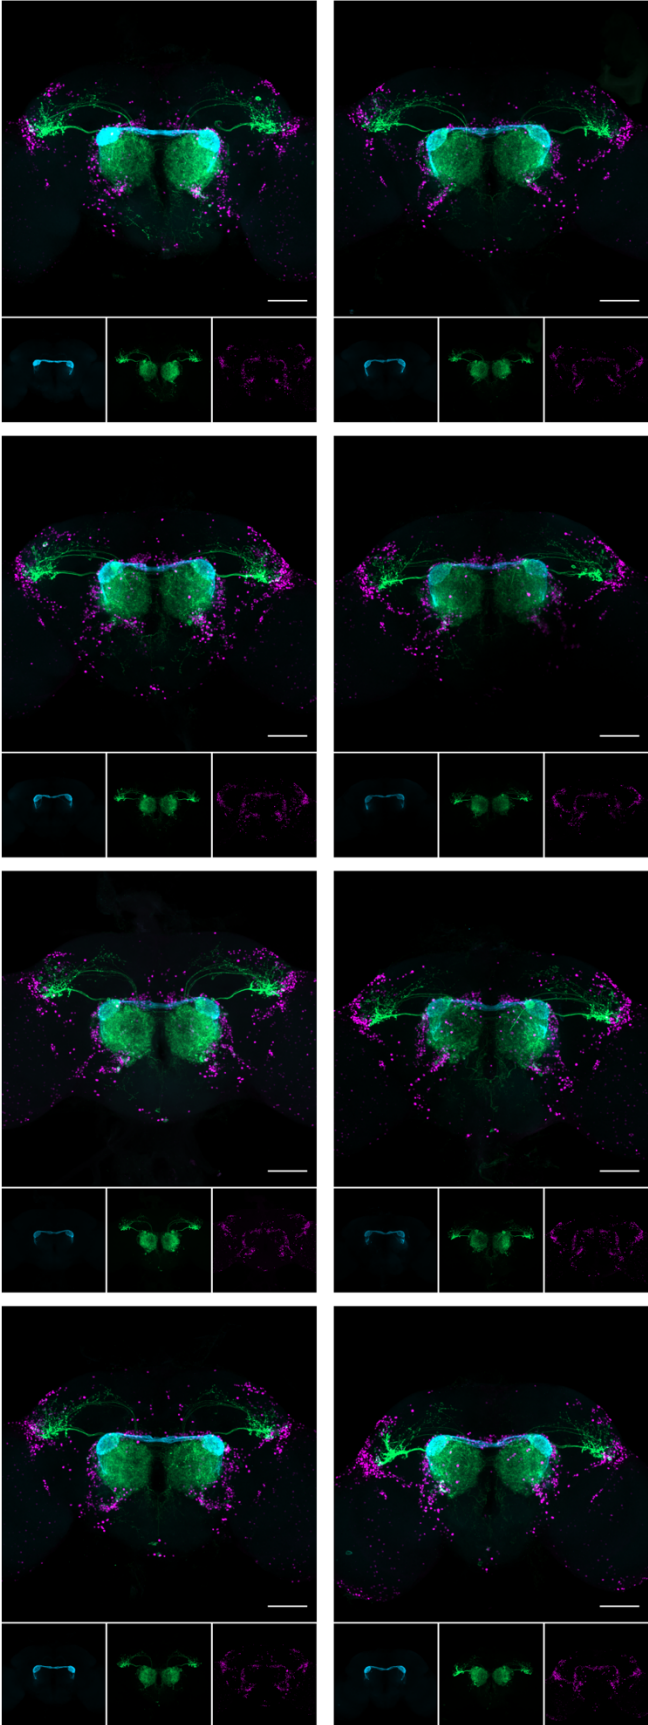

Figure S5. Consistency of the *ds*-Tango Signal

*ds*-Tango signal when initiated from Or67d-OSNs in eight different male brains with the same experimental parameters and image settings. Or67d-OSNs (cyan), their monosynaptic partners LNs and OPNs (green), and the nuclei of their disynaptic connections (magenta) are shown. Below each image of a brain, the individual channels for that image are displayed. Each image is a maximum intensity Z-stack projection of a whole-mount brain. Scale bars, 50 $\mu$ m.

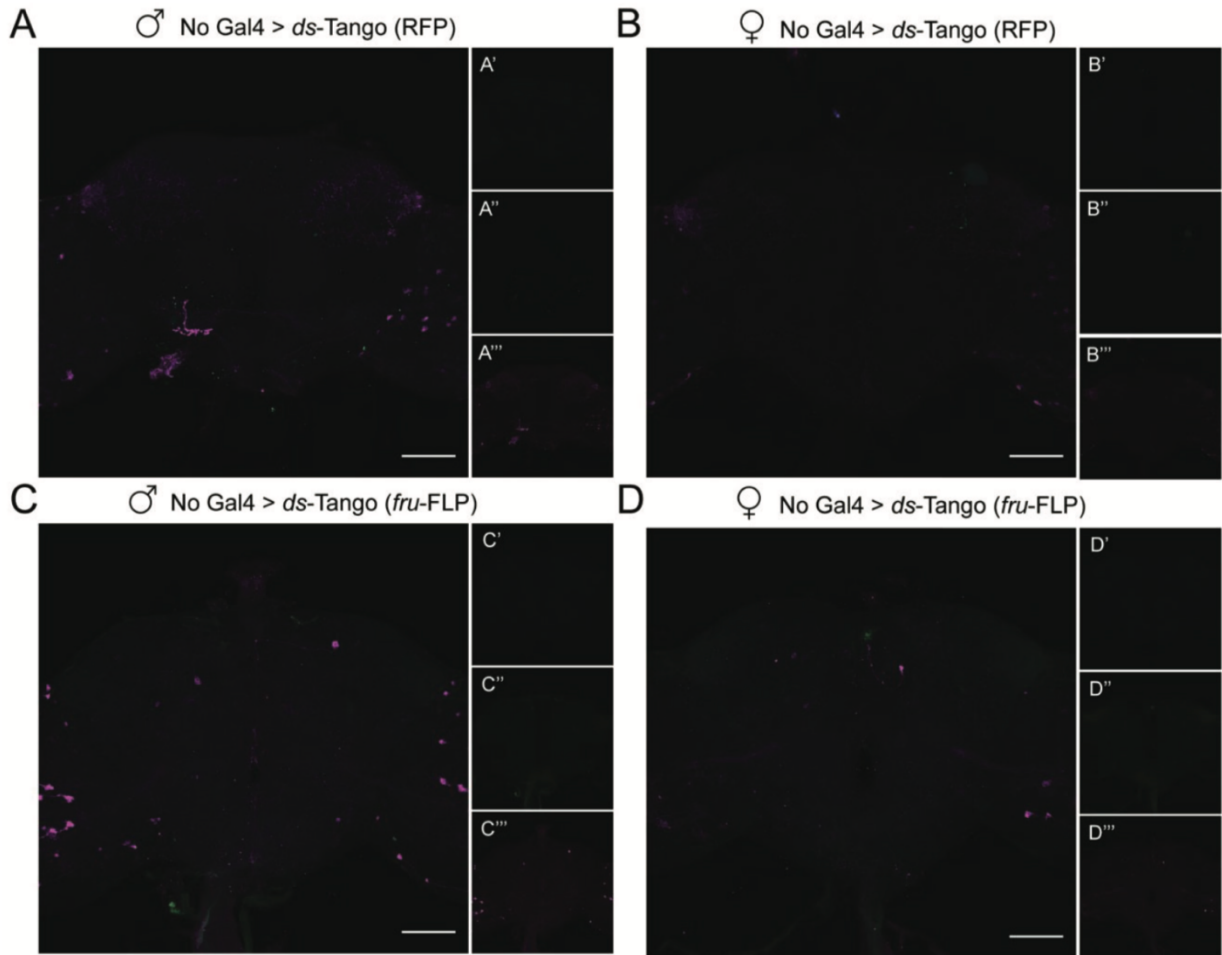

Figure S6. Minimal background signal is observed in different configurations of *ds-Tango*

A control experiment driving *ds-Tango* with a membrane-localized third-order reporter (RFP) and no Gal4 driver in males (A) and in females (B). Presynaptic background signal (cyan in A', B'), monosynaptic background signal (green in A'', B''), and disynaptic background signal (magenta in A''', B''') are shown.

A control experiment driving *ds-Tango* with a *fru-FLP* dependent reporter and no Gal4 driver in males (C) and in females (D). Presynaptic background signal (cyan shown in C', D'), monosynaptic background signal (green shown in C'', D''), and *fru-FLP*+ neurons

where disynaptic background signal is present (magenta shown in C'', D'') are shown. Each image is a maximum intensity Z-stack projection of a whole-mount brain. Scale bars, 50µm.

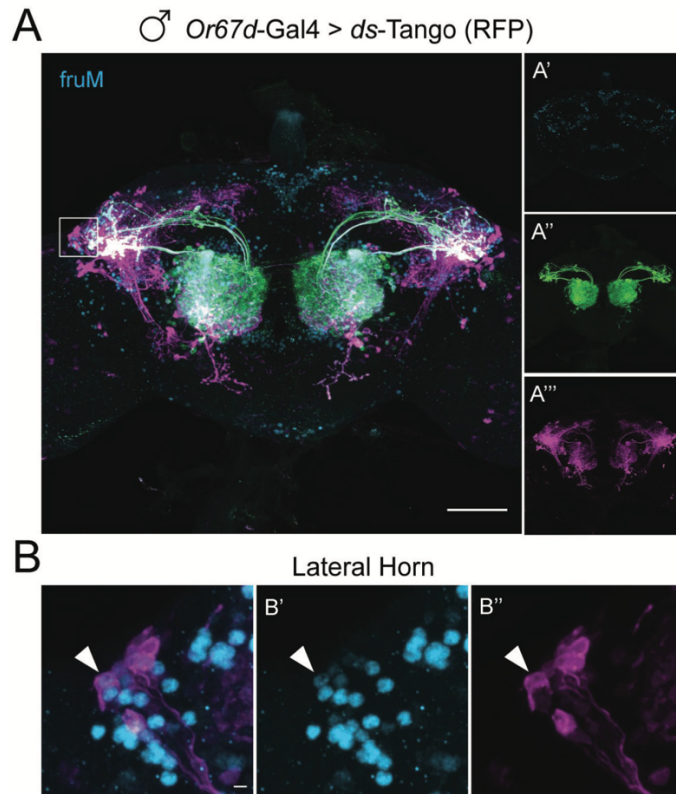

Figure S7. Some disynaptic connections revealed by *ds-Tango* when initiated from *Or67d*-OSNs are fruM+

(A) Driving the *ds-Tango* configuration containing a membrane-localized third-order reporter (RFP) with *Or67d-Gal4* in males. fruM antibody staining (cyan, in A'), the monosynaptic partners LNs and OPNs (green, in A''), and the disynaptic connections (magenta, in A''') are shown.

(B) A higher magnification image of the gray inset in (A) highlighting the left LH reveals colabeling of fruM (cyan, channel show in B') and some third-order LC neurons (magenta, shown in B''). Maximum intensity full Z-stack projection (A) and partial Z-stack projection (B) of whole-mount brains are shown. Scale bars, 50µm.

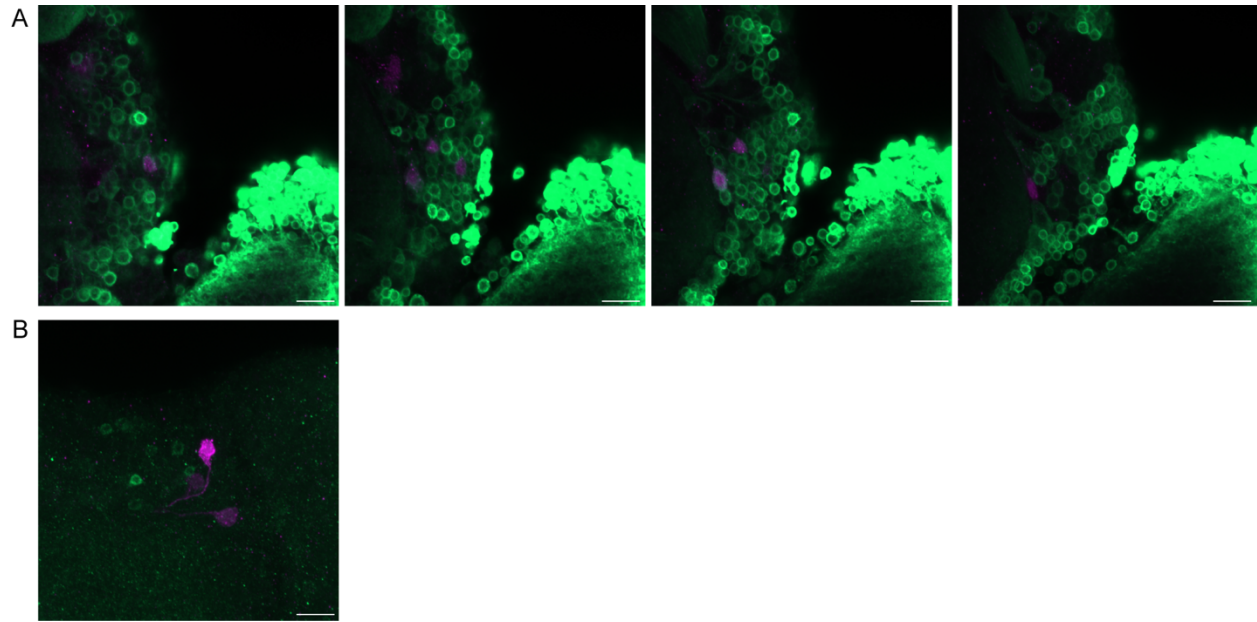

Figure S8. Almost all Maiandros neurons are cholinergic in males

(A) Subsets of the Z-stacks of the whole brain showing the Maiandros neurons (magenta) and GFP expressed under the control of the ChAT promoter (green). Almost all Maiandros neurons express GFP.

(B) Subset of the Z-stacks of the whole brain showing the Maiandros neurons (magenta) and GFP expressed under the control of the GAD promoter (green). No Maiandros neuron expresses GFP.

| Figure | Genotype                                                                                                                                                                                | Antibodies                       | Sex | Age (weeks) | Temp (°C) |
|--------|-----------------------------------------------------------------------------------------------------------------------------------------------------------------------------------------|----------------------------------|-----|-------------|-----------|
| 1A     | QUAS-mtdTomato-HA, UAS-myrGFP; <i>trans-Tango/+; Or67d-Gal4/+</i>                                                                                                                       | Cyan-GFP, Red-RFP, Grey-nc82     | M   | 3-4         | 18        |
| 1B     | QUAS-mtdTomato-HA, UAS-myrGFP; <i>trans-Tango/+; Or47b-Gal4/+</i>                                                                                                                       | Cyan-GFP, Red-RFP, Grey-nc82     | M   | 3-4         | 18        |
| 1C     | QUAS-mtdTomato-HA, UAS-myrGFP; <i>trans-Tango/+; Ir84a-Gal4/+</i>                                                                                                                       | Cyan-GFP, Red-RFP, Grey-nc82     | M   | 3-4         | 18        |
| 2B     | QUAS-nls::RFP; Elav-Arr:TEV nSyb-PTHR::TEVcs::QF INS nSyb-GCGR::TEVcs::LexA*/+; UAS-CD2 INS UAS-GCG::dNRX1, LexAop-GFP INS LexAop-PTH::dNRX1/ <i>Orco-Gal4</i>                          | Cyan-CD2, Green-GFP, Magenta-RFP | F   | 3-4         | 21        |
| 2C     | QUAS-nls::RFP; Elav-Arr:TEV nSyb-PTHR::TEVcs::QF INS nSyb-GCGR::TEVcs::LexA*/+; UAS-CD2 INS UAS-GCG::dNRX1, LexAop-GFP INS LexAop-PTH::dNRX1/+                                          | Cyan-CD2, Green-GFP, Magenta-RFP | F   | 3-4         | 21        |
| 2E     | QUAS-nls::RFP; Elav-Arr:TEV nSyb-PTHR::TEVcs::QF INS nSyb-GCGR::TEVcs::LexA*/+; UAS-CD2 INS UAS-GCG::dNRX1, LexAop-GFP/ <i>Orco-Gal4</i>                                                | Cyan-CD2, Green-GFP, Magenta-RFP | F   | 3-4         | 21        |
| 3B, 3C | QUAS-nls::RFP; Elav-Arr:TEV nSyb-PTHR::TEVcs::QF INS nSyb-GCGR::TEVcs::LexA*/+; UAS-CD2 INS UAS-GCG::dNRX1, LexAop-GFP INS LexAop-PTH::dNRX1/ <i>Or67d-Gal4</i>                         | Cyan-CD2, Green-GFP, Magenta-RFP | F   | 3-4         | 21        |
| 3E, 3F | QUAS-nls::RFP; Elav-Arr:TEV nSyb-PTHR::TEVcs::QF INS nSyb-GCGR::TEVcs::LexA*/+; UAS-CD2 INS UAS-GCG::dNRX1, LexAop-GFP INS LexAop-PTH::dNRX1/ <i>Or42a-Gal4</i>                         | Cyan-CD2, Green-GFP, Magenta-RFP | F   | 3-4         | 21        |
| 4A     | QUAS-tdTomato; Elav-Arr:TEV nSyb-PTHR::TEVcs::QF INS nSyb-GCGR::TEVcs::LexA*/+; UAS-CD2 INS UAS-GCG::dNRX1, LexAop-GFP INS LexAop-PTH::dNRX1/ <i>Or67d-Gal4</i>                         | Cyan-CD2, Green-GFP, Magenta-HA  | M   | 3-4         | 25        |
| 4B, 4C | w; Elav-Arr:TEV nSyb-PTHR::TEVcs::QF INS nSyb-GCGR::TEVcs::LexA*/+; UAS-FRT-STOP-FRT-GFP; UAS-CD2 INS UAS-GCG::dNRX1, LexAop-tdTomato INS LexAop-PTH::dNRX1/ <i>Or67d-Gal4, fru-FLP</i> | Cyan-CD2, Green-RFP, Magenta-GFP | M   | 4           | 18        |
| 4D     | QUAS-tdTomato/+; Elav-Arr:TEV nSyb-PTHR::TEVcs::QF INS nSyb-GCGR::TEVcs::LexA*/+; UAS-CD2 INS UAS-GCG::dNRX1, LexAop-GFP INS LexAop-PTH::dNRX1/ <i>Or67d-Gal4</i>                       | Cyan-CD2, Green-GFP, Magenta-HA  | F   | 3-4         | 25        |

|            |                                                                                                                                                                                                 |                                     |   |     |     |
|------------|-------------------------------------------------------------------------------------------------------------------------------------------------------------------------------------------------|-------------------------------------|---|-----|-----|
| 4E, 4F     | w; Elav-Arr:TEV nSyb-PTHR::TEVcs::QF INS nSyb-GCGR::TEVcs::LexA*/QUAS-FRT- STOP-FRT-GFP; UAS-CD2 INS UAS-GCG::dNRX1, LexAop-tdTomato INS LexAop-PTH::dNRX1/ <i>Or67d</i> -Gal4, <i>fru</i> -FLP | Cyan-CD2, Green-RFP, Magenta-GFP    | F | 4   | 18  |
| 5A         | QUAS-tdTomato; Elav-Arr:TEV nSyb-PTHR::TEVcs::QF INS nSyb-GCGR::TEVcs::LexA*/ <i>Or47b</i> -Gal4; UAS-CD2 INS UAS-GCG::dNRX1, LexAop-GFP INS LexAop-PTH::dNRX1/+                                | Cyan-CD2, Green-RFP, Magenta-GFP    | M | 3-4 | 21  |
| 5B         | w; Elav-Arr:TEV nSyb-PTHR::TEVcs::QF INS nSyb-GCGR::TEVcs::LexA*/QUAS-FRT- STOP-FRT-GFP/ <i>Or47b</i> -Gal4; UAS-CD2 INS UAS-GCG::dNRX1, LexAop-tdTomato INS LexAop-PTH::dNRX1/ <i>fru</i> -FLP | Cyan-CD2, Green-RFP, Magenta-GFP    | M | 3-4 | 21  |
| 5C         | QUAS-tdTomato; Elav-Arr:TEV nSyb-PTHR::TEVcs::QF INS nSyb-GCGR::TEVcs::LexA*/ <i>Ir84a</i> -Gal4; UAS-CD2 INS UAS-GCG::dNRX1, LexAop-GFP INS LexAop-PTH::dNRX1/+                                | Cyan-CD2, Green-RFP, Magenta-GFP    | M | 3-4 | 21  |
| 5D         | w; Elav-Arr:TEV nSyb-PTHR::TEVcs::QF INS nSyb-GCGR::TEVcs::LexA*/QUAS-FRT- STOP-FRT-GFP/ <i>Ir84a</i> -Gal4; UAS-CD2 INS UAS-GCG::dNRX1, LexAop-tdTomato INS LexAop-PTH::dNRX1/ <i>fru</i> -FLP | Cyan-CD2, Green-RFP, Magenta-GFP    | M | 3-4 | 21  |
| 6A         | +;VT060731-p65ADZp/+; VT006486-ZpGDBD /UAS-GFP                                                                                                                                                  | Green-GFP Grey-nc82                 | M | 1   | 25  |
| 6B         | +;VT060731-p65ADZp/+; VT006486-ZpGDBD /UAS-Syt::GFP,UAS-DenMark                                                                                                                                 | Green-GFP Magenta-DenMark Grey-nc82 | M | 1   | 25  |
| 6C, 6D, 6E | +;VT060731-p65ADZp/+; VT006486-ZpGDBD /UAS-Shi <sup>TS</sup> +;+;/+;+/ Shi <sup>TS</sup>                                                                                                        | NA                                  | M | 1   | 21  |
| S3A        | QUAS-nls::RFP; Elav-Arr:TEV nSyb-PTHR::TEVcs::QF INS nSyb-GCGR::TEVcs::LexA*/+; UAS-CD2 INS UAS-GCG::dNRX1, LexAop-GFP INS LexAop-PTH::dNRX1/ <i>Or67d</i> -Gal4                                | Cyan-CD2, Green-GFP, Magenta-RFP    | M | 3-4 | N/A |
| S3B        | QUAS-nls::RFP; Elav-Arr:TEV nSyb-PTHR::TEVcs::QF INS nSyb-GCGR::TEVcs::LexA*/+; UAS-CD2 INS UAS-GCG::dNRX1, LexAop-GFP INS LexAop-PTH::dNRX1/+                                                  | Cyan-CD2, Green-GFP, Magenta-RFP    | M | 3-4 | N/A |
| S4         | QUAS-nls::RFP; Elav-Arr:TEV nSyb-PTHR::TEVcs::QF INS nSyb-GCGR::TEVcs::LexA*/+; UAS-CD2 INS UAS-GCG::dNRX1, LexAop-GFP INS LexAop-PTH::dNRX1/ <i>Or67d</i> -Gal4                                | Cyan-CD2, Green-GFP, Magenta-RFP    | M | N/A | 18  |



|     |                                                                                                                                                                             |                                           |   |     |    |
|-----|-----------------------------------------------------------------------------------------------------------------------------------------------------------------------------|-------------------------------------------|---|-----|----|
| S5  | QUAS-nls::RFP; Elav-Arr:TEV nSyb-PTHR::TEVcs::QF INS nSyb-GCGR::TEVcs::LexA*/+; UAS-CD2 INS UAS-GCG::dNRX1, LexAop-GFP INS LexAop-PTH::dNRX1/ <i>Or67d</i> -Gal4            | Cyan-CD2, Green-GFP, Magenta-RFP          | M | 3-4 | 21 |
| S6A | QUAS-tdTomato; Elav-Arr:TEV nSyb-PTHR::TEVcs::QF INS nSyb-GCGR::TEVcs::LexA*/+; UAS-CD2 INS UAS-GCG::dNRX1, LexAop-GFP INS LexAop-PTH::dNRX1/+                              | Cyan-CD2, Green-GFP, Magenta-HA           | M | 3-4 | 25 |
| S6B | QUAS-tdTomato/+; Elav-Arr:TEV nSyb-PTHR::TEVcs::QF INS nSyb-GCGR::TEVcs::LexA*/+; UAS-CD2 INS UAS-GCG::dNRX1, LexAop-GFP INS LexAop-PTH::dNRX1/+                            | Cyan-CD2, Green-GFP, Magenta-HA           | F | 3-4 | 25 |
| S6C | w; Elav-Arr:TEV nSyb-PTHR::TEVcs::QF INS nSyb-GCGR::TEVcs::LexA*/QUAS-FRT- STOP-FRT-GFP; UAS-CD2 INS UAS-GCG::dNRX1, LexAop-tdTomato INS LexAop-PTH::dNRX1/ <i>fru</i> -FLP | Cyan-CD2, Green-RFP, Magenta-GFP          | M | 4   | 18 |
| S6D | w; Elav-Arr:TEV nSyb-PTHR::TEVcs::QF INS nSyb-GCGR::TEVcs::LexA*/QUAS-FRT- STOP-FRT-GFP; UAS-CD2 INS UAS-GCG::dNRX1, LexAop-tdTomato INS LexAop-PTH::dNRX1/ <i>fru</i> -FLP | Cyan-CD2, Green-RFP, Magenta-GFP          | F | 4   | 18 |
| S7  | QUAS-tdTomato; Elav-Arr:TEV nSyb-PTHR::TEVcs::QF INS nSyb-GCGR::TEVcs::LexA*/+; UAS-CD2 INS UAS-GCG::dNRX1, LexAop-GFP INS LexAop-PTH::dNRX1/ <i>Or67d</i> -Gal4            | Cyan- <i>fru</i> M, Green-GFP, Magenta-HA | M | 3-4 | 21 |
| S8A | UAS-mCD8-RFP, LexAop-mCD8-GFP;VT060731-p65ADZp/+; VT006486-ZpGDBD/ChAT-P2A-LexA                                                                                             | Green-GFP Magenta-RFP                     | M | 1   | 25 |
| S8B | UAS-mCD8-RFP, LexAop-mCD8-GFP;VT060731-p65ADZp/+; VT006486-ZpGDBD/GAD-P2A-LexA                                                                                              | Green-GFP Magenta-RFP                     | M | 1   | 25 |

Table S1. Fly genotypes used and experimental details for each figure  
Old
